# Supplementary material
Source: ML conference proceedings conference paper supplement (https://proceedings.neurips.cc/paper_files/paper/2021/hash/2417dc8af8570f274e6775d4d60496da-Abstract.html)
Supplement: Supplementary file [file 2417dc8af8570f274e6775d4d60496da-Supplemental.pdf]

# Appendix

## Table of Contents

|                                      |           |
|--------------------------------------|-----------|
| <b>A Proof of Proposition 4</b>      | <b>13</b> |
| <b>B Proof of Proposition 7</b>      | <b>14</b> |
| <b>C Proof of Theorem 12</b>         | <b>15</b> |
| <b>D Proof of Proposition 15</b>     | <b>16</b> |
| <b>E Proof of Theorem 19</b>         | <b>17</b> |
| <b>F Proofs of Section 5 Results</b> | <b>19</b> |
| F.1 Proof of Corollary 16 . . . . .  | 19        |
| F.2 Proof of Lemma 17 . . . . .      | 20        |
| F.3 Proof of Corollary 18 . . . . .  | 20        |
| F.4 Proof of Corollary 20 . . . . .  | 21        |
| <b>G Technical Lemmas</b>            | <b>21</b> |

### A Proof of Proposition 4

We recall Proposition 4

**Proposition 4.** *Let  $f$  be  $(\mu, d)$ -convex. Suppose  $\hat{x}$  minimizes  $f$  over  $S$  and  $\tilde{x}$  minimizes  $f$  over  $\text{star}(\hat{x}, S)$ . Then, for any  $x \in S$ ,*

$$f(x) - f(\tilde{x}) \geq \mu \left( \frac{1}{3}d(x, \tilde{x}) \right).$$

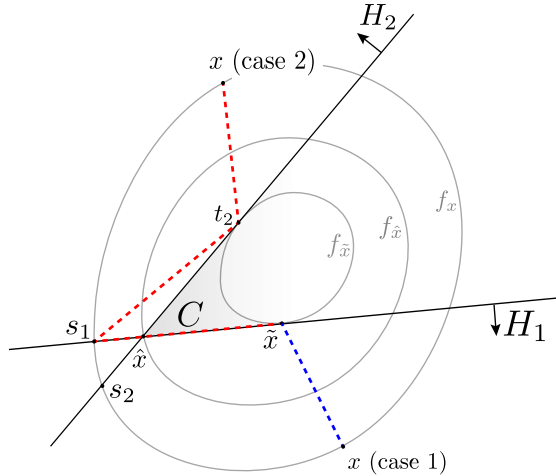

Figure 3: Illustration of Proposition 4.

*Proof.* The proof relies on the observation that if  $\lambda \mapsto z_\lambda$  is a line segment such that  $z_0 \in \partial f_x$  (i.e.  $f(z_0) = f(x)$ ),  $z_1 \in \partial f_y$  (i.e.  $f(z_1) = f(y)$ ), and  $z_\lambda \in f_x \setminus f_y^\circ$  (i.e.  $f(x) \geq f(z_\lambda) \geq f(y)$ ) for  $\lambda \in [0, 1]$ , then

$$f(x) - f(y) = f(z_0) - f(z_1) \geq \mu(d(z_0, z_1)).$$

This is seen by repeating the proof of Lemma 3: since  $z_\lambda \notin f_y^\circ$  we must have  $(f(z_\lambda) - f(z_1))/\lambda \geq 0$ . Plugging in  $z_\lambda = z_0 + \lambda(z_1 - z_0)$  and taking the limit infimum as  $\lambda \downarrow 0$  gives  $0 \leq \langle \nabla f|_{z_1}, z_0 - z_1 \rangle$ . By  $(\mu, d)$ -convexity of  $f$ , then,

$$f(z_1) - f(z_0) \geq f(z_1) - f(z_0) - \langle \nabla f|_{z_1}, z_0 - z_1 \rangle \geq \mu(d(z_1, z_0)).$$

Finally, if  $k$  such segments  $z_\lambda$  form a path from  $x$  to  $y$ , then at least one of them must have  $d(z_1, z_0) \geq \frac{1}{k}d(x, y)$ . This is due to the triangle inequality for  $d$ .

We now restrict our attention to the plane  $P$  containing  $(x, \hat{x}, \tilde{x})$ . Let  $C$  be the minimal cone containing  $f_{\tilde{x}}$  with vertex at  $\hat{x}$ . We note that, by optimality of  $\tilde{x}$ , no point  $x \in S$  can lie in the interior of  $C$ .

Then  $C \cap P$  is complementary to the union of two half-planes  $H_1$  and  $H_2$  with boundary lines  $\ell_1$  and  $\ell_2$ , respectively. These lines intersect  $\partial f_x$  at two respective points,  $s_1$  and  $s_2$ , and are tangent to  $f_{\tilde{x}}$  at two respective points,  $t_1 \equiv \tilde{x}$  and  $t_2$ . Finally,  $f_x \supseteq f_{\tilde{x}}$  by optimality of  $\hat{x}$ . This is depicted in Figure 3 above.

There are two cases to consider. In the first case,  $x \in H_1$ . Then the line segment connecting  $\tilde{x}$  and  $x$  is contained entirely in  $D = f_x \setminus f_{\tilde{x}}^\circ$ . By the preceding discussion,

$$f(x) - f(\tilde{x}) \geq \mu(d(x, \tilde{x})) \geq \mu\left(\frac{1}{3}d(x, \tilde{x})\right).$$

In the second case  $x \in H_2 \setminus H_1$ . In this case, the segment from  $\tilde{x}$  to  $s_1$  along  $\ell_1$  lies entirely in  $D$ . Similarly, the segments from  $s_1$  to  $t_2$  and from  $t_2$  to  $x$  are line segments contained in  $D$ . Each of these three segments connects  $\partial f_{\tilde{x}}$  to  $\partial f_x$ , and they together form a path from  $\tilde{x}$  to  $x$ . By the preceding discussion,

$$f(x) - f(\tilde{x}) \geq \mu\left(\frac{1}{3}d(x, \tilde{x})\right).$$

This completes the proof.  $\square$

## B Proof of Proposition 7

We recall Proposition 7:

**Proposition 7.** *Let  $\mathcal{F}$  be a model class,  $\psi$  a  $(\mu, d)$ -convex loss, and  $f^*$  the population minimizer of the  $\psi$ -risk. Then, the star estimator  $\tilde{f}$  satisfies the excess risk bound*

$$\mathbb{E}\Psi(\mathcal{E}(\tilde{f})) \leq \mathbb{E}\Psi\left(\sup_{f \in \mathcal{F}'} \left\{ \frac{1}{n} \sum_{i=1}^n 2\varepsilon'_i(\psi_i(f^*) - \psi_i(f)) - (1 + \varepsilon'_i)\mu\left(\frac{1}{3}d(f_i, f_i^*)\right) \right\}\right) \quad (10)$$

where the  $\varepsilon'_i$  are i.i.d. symmetric Rademacher random variables,  $\mathcal{F}' = \cup_{\lambda \in [0,1]} \lambda\mathcal{F} + (1 - \lambda)\mathcal{F}$ , and  $\Psi : \mathbb{R} \rightarrow \mathbb{R}$  is any increasing, convex function.

*Proof.* We'll work forwards from (9), which says that

$$\mathcal{E}(\tilde{f}) = \mathbb{E}\psi(\tilde{f}_i) - \mathbb{E}\psi(f^*)_i \leq \sup_{f \in \mathcal{F}'} \left\{ (\mathbb{E}_n - \mathbb{E})(\psi(f_i^*) - \psi(f_i)) - \mathbb{E}_n \mu(d(f_i, f_i^*)/3) \right\}$$

Using the notation  $\Delta_i(f) = \psi(f_i^*) - \psi(f)_i$ ,  $\nu_i(f) = \frac{1}{2}\mu(\frac{1}{3}d(f_i, f_i^*))$ , we can rewrite this as

$$\mathcal{E}(\tilde{f}) \leq \sup_{f \in \mathcal{F}'} \left\{ \frac{1}{n} \sum_{i=1}^n (1 - \mathbb{E})\Delta_i(f) - 2\nu_i(f) \right\}.$$

Adding and subtracting  $\mathbb{E}\nu_i(f)$  gives

$$= \sup_{f \in \mathcal{F}'} \left\{ \frac{1}{n} \sum_{i=1}^n (1 - \mathbb{E})(\Delta_i(f) - \nu_i(f)) - (1 + \mathbb{E})\nu_i(f) \right\}.$$

By applying  $\mathbb{E}\Psi$  to both sides and applying Lemma G1 (a symmetrization result along the lines of Liang et al. (2015)) with  $A = \Delta$ ,  $B = \nu$ , and  $T = \mathcal{F}$ , we get

$$\begin{aligned} &\leq \mathbb{E}\Psi\left(2 \sup_{f \in \mathcal{F}'} \left\{ \frac{1}{n} \sum_{i=1}^n \varepsilon'_i(\Delta_i(f) - \nu_i(f)) - \nu_i(f) \right\}\right) \\ &= \mathbb{E}\Psi\left(\sup_{f \in \mathcal{F}'} \left\{ \frac{1}{n} \sum_{i=1}^n 2\varepsilon'_i(\psi(f^*)_i - \psi(f)_i - \frac{1}{2}\mu(\frac{1}{3}d(f_i, f_i^*))) - \mu(\frac{1}{3}d(f_i, f_i^*)) \right\}\right), \end{aligned}$$

where we plugged in the definition of  $\Delta_i$  and  $\nu_i$ . This completes the proof.  $\square$

## C Proof of Theorem 12

We recall Theorem 12:

**Theorem 12.** *Let  $\psi$  be an  $\eta$ -exp-concave loss function taking values in  $[0, m]$ . Then the star estimator in  $\mathcal{F}$  satisfies the excess risk bound*

$$\mathbb{E}\Psi(\mathcal{E}(\tilde{f})) \leq \mathbb{E}\Psi \left( \sup_{f, g \in \mathcal{F}'} \left\{ \frac{1}{n} \sum_{i=1}^n 4\varepsilon'_i(\psi_i(f) - \psi_i(g)) - \frac{\eta(\psi_i(f) - \psi_i(g))^2}{18m\eta \vee 36} \right\} \right). \quad (15)$$

where  $\Psi$  is any increasing, convex function and  $\mathcal{F}' = \cup_{\lambda \in [0, 1]} \lambda \mathcal{F} + (1 - \lambda) \mathcal{F}$ . Alternatively, when  $\psi$  is  $p$ -uniformly convex with modulus  $\alpha$  and  $\|\psi\|_{\text{lip}}$ -Lipschitz, we have

$$\mathbb{E}\Psi(\mathcal{E}(\tilde{f})) \leq \mathbb{E}\Psi \left( \sup_{f, g \in \mathcal{F}'} \left\{ \frac{1}{n} \sum_{i=1}^n 4\|\psi\|_{\text{lip}}(f_i - g_i)\varepsilon'_i - \frac{\alpha|f_i - g_i|^p}{3^p} \right\} \right). \quad (16)$$

*Proof.* We'll work forwards from (10), which says that

$$\begin{aligned} \mathbb{E}\Psi(\mathcal{E}(\tilde{f})) &\leq \mathbb{E}\Psi \left( \sup_{f \in \mathcal{F}'} \left\{ \frac{1}{n} \sum_{i=1}^n 2\varepsilon'_i(\psi(f^*)_i - \psi(f)_i - \frac{1}{2}\mu(\frac{1}{3}d(f_i, f_i^*))) - \mu(\frac{1}{3}d(f_i, f_i^*)) \right\} \right) \\ &\leq \mathbb{E}\Psi \left( \sup_{f, g \in \mathcal{F}'} \left\{ \frac{1}{n} \sum_{i=1}^n 2\varepsilon'_i(\psi(g)_i - \psi(f)_i - \frac{1}{2}\mu(\frac{1}{3}d(f_i, g_i))) - \mu(\frac{1}{3}d(f_i, g_i)) \right\} \right), \end{aligned}$$

where the second step enlarges the domain in the supremum. For (15), we plug in the definition of the offset from Proposition 11

$$\mu(\frac{1}{3}d(x, y)) = \frac{|\psi(x) - \psi(y)|^2}{18m \vee 36/\eta}.$$

Under the condition that  $\psi$  takes values in  $[0, m]$ , we have that

$$|\psi(x) - \psi(y)|^2 \leq 2m|\psi(x) - \psi(y)| \leq (2m \vee 4/\eta)|\psi(x) - \psi(y)|.$$

It follows that we can apply our ‘‘contraction lemma’’ for offset processes, Lemma G2, with the contractions

$$\begin{aligned} &|\psi(x) - \psi(y) - \frac{1}{2}\mu(\frac{1}{3}d(x, y))| \\ &\leq |\psi(x) - \psi(y)| + |\frac{1}{2}\mu(\frac{1}{3}d(x, y))| \\ &\leq |\psi(x) - \psi(y)| + \frac{(m \vee 2/\eta)|\psi(x) - \psi(y)|}{18m \vee 36/\eta} \leq \frac{19}{18}|\psi(x) - \psi(y)|. \end{aligned}$$

For (16), we first require the following lemma.

**Lemma C1.** *Let  $\psi : \mathbb{R} \rightarrow \mathbb{R}$  be  $(\mu, d)$ -convex and  $\|\psi\|_{\text{lip}}$ -Lipschitz with respect to  $d(x, y) = |x - y|$ . Let  $r \geq 0$  be the largest constant such that  $\mu(cx) \leq c^r \mu(x)$  for  $c \leq 1$  which is non-negative by monotonicity of  $\mu$ . Then*

$$\mu(\frac{1}{3}|x - y|) \leq (\frac{2}{3})^r \|\psi\|_{\text{lip}} |x - y|.$$

Applying the lemma with  $r = p$ , we simply apply the contractions

$$|\psi(x) - \psi(y) - \frac{1}{2}\mu(\frac{1}{3}d(x, y))| \leq |\psi(x) - \psi(y)| + \frac{1}{2}\mu(\frac{1}{3}d(x, y)) \leq (1 + 2^{p-1}/3^p) \|\psi\|_{\text{lip}} |x - y|$$

using Lemma G2, and then plug in

$$\mu(\frac{1}{3}d(x, y)) = \frac{\alpha|x - y|^p}{3^p},$$

from the definition of  $p$ -uniform convexity.

*Proof of Lemma C1.* Let  $z$  be the minimizer of  $\psi$  over  $[x, y]$ . By Lemma 3 we have

$$\psi(x) - \psi(z) \geq \mu(|x - z|), \quad \psi(y) - \psi(z) \geq \mu(|y - z|). \quad (25)$$

Since  $|x - y| = |x - z| + |y - z|$  because  $z \in [x, y]$ , we have

$$\mu\left(\frac{1}{3}|x - y|\right) \leq \mu\left(\frac{1}{3}(|x - z| + |y - z|)\right).$$

By monotonicity of  $\mu$ , this is

$$\begin{aligned} &\leq \mu\left(\frac{2}{3}(|x - z| \vee |y - z|)\right) \\ &\leq \left(\frac{2}{3}\right)^r \{\mu(|x - z|) \vee \mu(|y - z|)\}. \end{aligned}$$

Using (25), we have

$$\begin{aligned} &\leq \left(\frac{2}{3}\right)^r |\psi(x) - \psi(z)| \vee \left(\frac{2}{3}\right)^r |\psi(y) - \psi(z)| \\ &\leq \left(\frac{2}{3}\right)^r \|\psi\|_{\text{lip}} |x - z| \vee \left(\frac{2}{3}\right)^r \|\psi\|_{\text{lip}} |y - z| \\ &\leq \left(\frac{2}{3}\right)^r \|\psi\|_{\text{lip}} |x - y|, \end{aligned}$$

where in the last step we again used that

$$|x - y| = |x - z| + |y - z| \geq |x - z| \vee |y - z|$$

by our choice of  $z$ . This completes the proof.  $\square$

$\square$

$\square$

## D Proof of Proposition 15

We recall Proposition 15.

**Proposition 15.** *If  $\psi$  is a self-concordant loss and  $\hat{f}$  is the empirical risk minimizer in a convex class  $\mathcal{F}$ , then*

$$\mathbb{E}\Psi(\mathcal{E}(\hat{f})) \leq \mathbb{E}\Psi\left(\sup_{f \in \mathcal{F}'} \left\{ \frac{1}{n} \sum_{i=1}^n 4(\psi_i(f) - \psi(f_i^*))\varepsilon'_i - \omega(\|f - f_i^*\|_{\psi, f_i^*}) \right\}\right), \quad (18)$$

for  $\omega(z) = z - \log(1 + z)$ ,  $\|z\|_{\psi, w} \doteq \sqrt{z^2 \psi''(w)}$ , and  $(\varepsilon'_i)_{i=1}^n$  are independent, symmetric Rademacher random variables and  $\Psi$  is any increasing, convex function.

*Proof.* Combining the self-concordance inequality Lemma 14 with Lemmas 3 and 5 immediately gives us

$$\mathcal{E}(\hat{f}) = \mathbb{E}\psi(\hat{f}) - \mathbb{E}\psi(f^*) \geq \mathbb{E}\omega(\|\hat{f} - f^*\|_{\psi, f^*}) \quad (26)$$

for the empirical risk minimizer  $\hat{f}$  in a convex class. Since  $\hat{f}$  is the risk minimizer, we also have  $\mathbb{E}_n\psi(f^*) - \mathbb{E}_n\psi(\hat{f}) \geq 0$ . Adding these two and rearranging, we have

$$\begin{aligned} \mathcal{E}(\hat{f}) &\leq 2\mathcal{E}(\hat{f}) - \mathbb{E}\omega(\|\hat{f} - f^*\|_{\psi, f^*}) \\ &\leq 2(\mathbb{E} - \mathbb{E}_n)\psi(\hat{f}) - 2(\mathbb{E} - \mathbb{E}_n)\psi(f^*) - \mathbb{E}\omega(\|\hat{f} - f^*\|_{\psi, f^*}) \\ &\leq 2 \sup_{f \in \mathcal{F}} \left\{ (\mathbb{E} - \mathbb{E}_n)\psi(\hat{f}) - (\mathbb{E} - \mathbb{E}_n)\psi(f^*) - \frac{1}{2}\mathbb{E}\omega(\|f - f^*\|_{\psi, f^*}) \right\} \end{aligned}$$

Applying  $\mathbb{E}\Psi$  on both sides gives

$$\begin{aligned} \mathbb{E}\Psi(\mathcal{E}(\hat{f})) &\leq \mathbb{E}\Psi\left(2 \sup_{f \in \mathcal{F}} \left\{ (\mathbb{E} - \mathbb{E}_n)\psi(\hat{f}) - (\mathbb{E} - \mathbb{E}_n)\psi(f^*) - \frac{1}{2}\mathbb{E}\omega(\|f - f^*\|_{\psi, f^*}) \right\}\right) \\ &= \mathbb{E}\Psi\left(2 \sup_{f \in \mathcal{F}} \left\{ (\mathbb{E} - \mathbb{E}_n)(\psi(\hat{f}) - \psi(f^*)) - \frac{1}{4}(\mathbb{E} + \mathbb{E})\omega(\|f - f^*\|_{\psi, f^*}) \right\}\right) \end{aligned}$$

By Jensen's inequality, this is

$$\leq \mathbb{E}\Psi\left(2 \sup_{f \in \mathcal{F}} \left\{ (\mathbb{E} - \mathbb{E}_n)(\psi(\hat{f}) - \psi(f^*)) - \frac{1}{4}(1 + \mathbb{E})\omega(\|f - f^*\|_{\psi, f^*}) \right\}\right).$$

The proof is then complete after applying Lemma G1 with  $A(f) = 2(\psi(f) - \psi(f^*))$ ,  $T = \mathcal{F}$ , and  $B(f) = \frac{1}{2}\omega(\|f - f^*\|_{\psi, f^*})$ .  $\square$

## E Proof of Theorem 19

We recall Theorem 19.

**Theorem 19.** *Let  $\psi$  be an  $\eta$ -exp-concave loss taking values in  $[0, m]$ . Then, with probability at least  $1 - 9e^{-z}$ , the star estimator  $\tilde{f}$  applied to  $(\psi, \mathcal{F})$  satisfies*

$$\mathcal{E}(\tilde{f}) \leq \inf_{0 \leq \alpha \leq \gamma} \left\{ 4\alpha + \frac{10}{\sqrt{n}} \int_{\alpha}^{\gamma} \sqrt{H_2(s)} ds + \frac{2H_2(\gamma)}{cn} + \frac{\gamma\sqrt{8\pi}}{\sqrt{n}} + \left( \frac{2}{cn} + \frac{\gamma\sqrt{8}}{\sqrt{n}} \right) z \right\}, \quad (23)$$

where  $H_2(s) \doteq H_2(s, \psi \circ \mathcal{F}')$  and  $c = 36^{-1}(1/m \wedge \eta/2)$ .

*Proof.* We work forwards from (15), which tells us

$$\mathbb{E}\Psi(\mathcal{E}(\tilde{f})) \leq \mathbb{E}\Psi \left( \sup_{t \in T} \{Z_t - cZ_t^2\} \right),$$

where we define  $Z$ ,  $t$ ,  $T$ , and  $c$  according to

$$\begin{aligned} Z_t &= \frac{1}{n} \sum_{i=1}^n 4\varepsilon'_i t(X_i, Y_i) = \frac{1}{n} \sum_{i=1}^n 4\varepsilon'_i (\psi(f(X_i), Y_i) - \psi(g(X_i), Y_i)), \\ t &= \psi(f(X_i), Y_i) - \psi(g(X_i), Y_i), \\ T &= \psi \circ \mathcal{F}' - \psi \circ \mathcal{F}', \\ c &= \frac{1}{36} \left( \frac{1}{m} \vee \frac{\eta}{2} \right). \end{aligned}$$

Let  $V$  be a covering of  $T$  at resolution  $\gamma$  in  $L^2(\mathbb{P}_n)$  that is chosen to include 0, so that  $\#V \leq \exp(2H_2(\gamma))$  almost surely by construction of  $T$  and definition of  $H_2(-)$ . Then we can choose  $\pi : T \rightarrow V$  with the properties that (1)  $\|t - \pi(t)\|_{2, \mathbb{P}} \leq \gamma$  uniformly over  $t \in T$ , and (2)  $\pi(t) = 0$  if  $\|t\|_{2, \mathbb{P}} < \gamma$ .

The proof will proceed in three lemmas which will be stated below and proved subsequently. The first lemma shows that  $\sup_{t \in T} \{Z_t - cZ_t^2\}$  can be controlled in terms of (i) the local complexity of  $(Z_t)_{t \in T}$  at scale  $\gamma$  and (ii) the offset complexity of a finite approximation to  $(Z_t)_{t \in T}$  at resolution  $\gamma$ . The second and third lemmas develop high-probability bounds for these two terms.

**Lemma E1** (from Liang et al. (2015, Lemma 6)). *It holds almost surely that*

$$\sup_{t \in T} \{Z_t - cZ_t^2\} \leq \sup_{t \in T} \{Z_t - Z_{\pi(t)}\} + \sup_{v \in V} \{Z_v - (c/4)Z_v^2\}. \quad (27)$$

**Lemma E2.**

$$\mathbb{P} \left( \sup_{t \in T} \{Z_t - Z_{\pi(t)}\} \geq 4\alpha + \frac{10}{\sqrt{n}} \int_{\alpha}^{\gamma} \sqrt{2H_2(s)} ds + \gamma\sqrt{\frac{8\pi}{n}} + x \right) \leq 2e^{-nx^2/(8\gamma^2)} \quad (28)$$

**Lemma E3.**

$$\mathbb{P} \left( \sup_{v \in V} \{Z_v - (c/4)Z_v^2\} > \frac{4H_2(\gamma) + 2x}{cn} \right) \leq e^{-x}. \quad (29)$$

Applying a union bound to the event in (28) with  $x = z\gamma\sqrt{8}$ , the event in (29) with  $z = x$ , and the complement of the event (27), we obtain that with probability at least  $1 - 3e^{-z}$

$$\sup_{t \in T} \{Z_t - Z_{\pi(t)}\} \leq 4\alpha + \frac{10}{\sqrt{n}} \int_{\alpha}^{\gamma} \sqrt{H_2(s)} ds + \frac{2H_2(\gamma)}{cn} + \frac{\gamma\sqrt{8\pi}}{\sqrt{n}} + \left( \frac{2}{cn} + \frac{\gamma\sqrt{8}}{\sqrt{n}} \right) z$$

Finally, since  $\mathbb{E}\Psi(\mathcal{E}(\tilde{f})) \leq \mathbb{E}\Psi \left( \sup_{t \in T} \{Z_t - cZ_t^2\} \right)$  for all convex and increasing  $\Psi$ , we can apply the following.

**Lemma E4** (Panchenko (2003, Lemma 1)). *If  $\mathbb{E}\Psi(X) \leq \mathbb{E}\Psi(Y)$  for all convex and increasing functions  $\Psi$ , then*

$$\mathbb{P}(Y \geq t) \leq Ae^{-at} \implies \mathbb{P}(X \geq t) \leq Ae^{1-at}.$$

Thus, we have

$$\mathcal{E}(\tilde{f}) \leq 4\alpha + \frac{10}{\sqrt{n}} \int_{\alpha}^{\gamma} \sqrt{H_2(s)} ds + \frac{2H_2(\gamma)}{cn} + \frac{\gamma\sqrt{8\pi}}{\sqrt{n}} + \left( \frac{2}{cn} + \frac{\gamma\sqrt{8}}{\sqrt{n}} \right) z$$

with probability at least  $1 - (3e)e^{-z}$ . After noting that  $0 \leq \alpha \leq \gamma$  is arbitrary and  $3e \leq 9$ , the proof is complete.  $\square$

*Proof of Lemma E1.* We have

$$\begin{aligned} \sup_{t \in T} \left\{ Z_t - cZ_t^2 \right\} &= \sup_{t \in T} \left\{ (Z_t - Z_{\pi(t)}) + ((c/4)Z_{\pi(t)}^2 - cZ_t^2) - \left( cZ_t^2 + Z_{\pi(t)} - (c/4)Z_{\pi(t)}^2 \right) \right\} \\ &\leq \sup_{t \in T} \left\{ Z_t - Z_{\pi(t)} \right\} + \sup_{v \in V} \left\{ Z_v - (c/4)Z_v^2 \right\}, \end{aligned}$$

provided we can show that the middle term  $(c/4)Z_{\pi(t)}^2 - cZ_t^2$  is a.s. non-positive. To see this, note that either  $\|t\|_{2, \mathbb{P}_n} < \gamma$ , in which case by construction  $\pi(t) = 0$  and  $Z_{\pi(t)}^2 = 0$ , so we are done, or else we have

$$\|\pi(t)\|_{2, \mathbb{P}_n} \leq \|\pi(t) - t\|_{2, \mathbb{P}_n} + \|t\|_{2, \mathbb{P}_n} \leq \|t\|_{2, \mathbb{P}_n} + \gamma \leq 2\|t\|_{2, \mathbb{P}_n},$$

so that  $\|\pi(t)\|_{2, \mathbb{P}_n}^2 \leq 4\|t\|_{2, \mathbb{P}_n}^2$ . But, after plugging in the definition of  $Z_t$ , the middle term is precisely

$$\frac{16c}{n} \left( \frac{\|\pi(t)\|_{2, \mathbb{P}_n}^2}{4} - \|t\|_{2, \mathbb{P}_n}^2 \right),$$

so we are done.  $\square$

*Proof of Lemma E2.* Keeping in mind that  $\|t - \pi(t)\|_{2, \mathbb{P}_n} \leq \gamma$  and applying the chaining result in Srebro et al. (2010, Lemma A.3) gives us

$$\mathbb{E}_{\varepsilon} \sup_{t \in T} \left\{ Z_t - Z_{\pi(t)} \right\} \leq 4\alpha + \frac{10}{\sqrt{n}} \int_{\alpha}^{\gamma} \sqrt{2H_2(s)} ds \quad (30)$$

almost surely with respect to the data, where we used that

$$\ln N(s, T, L^2(\mathbb{P}_n)) \leq 2 \ln N(s, \psi \circ \mathcal{F}', L^2(\mathbb{P}_n)) \leq 2H_2(s)$$

by definition of  $T$  and the fact that  $H_2(-)$  is an almost-sure bound on the logarithm of the  $L^2(\mathbb{P}_n)$  covering numbers. It follows by applying Ledoux and Talagrand (1991, Theorem 4.7) with  $\sigma^2(X) = \gamma^2/n$  that

$$\mathbb{P}_{\varepsilon} \left( \sup_{t \in T} \left\{ Z_t - Z_{\pi(t)} \right\} \geq M_{\varepsilon} + x \right) \leq 2e^{-nx^2/(8\gamma^2)}, \quad (31)$$

where  $\mathbb{P}_{\varepsilon}$  denotes the probability with respect to the multipliers  $\varepsilon$  conditional upon the data and  $M_{\varepsilon}$  is a conditional median of  $\sup_{t \in T} \{Z_t - Z_{\pi(t)}\}$ . Finally, we can deduce the upper bound

$$\begin{aligned} &\mathbb{E}_{\varepsilon} \sup_{t \in T} \left\{ Z_t - Z_{\pi(t)} \right\} - M_{\varepsilon} \\ &\leq \mathbb{E}_{\varepsilon} \left[ \left( \sup_{t \in T} \left\{ Z_t - Z_{\pi(t)} \right\} - M_{\varepsilon} \right) \mathbb{1} \left\{ \sup_{t \in T} \left\{ Z_t - Z_{\pi(t)} \right\} > M_{\varepsilon} \right\} \right] \\ &= \int_0^{\infty} \mathbb{P}_{\varepsilon} \left( \sup_{t \in T} \left\{ Z_t - Z_{\pi(t)} \right\} - M_{\varepsilon} > t \right) dt \\ &\leq \int_0^{\infty} 2e^{-nt^2/(8\gamma^2)} dt = \gamma \sqrt{\frac{8\pi}{n}} \end{aligned} \quad (32)$$

Finally, putting together (30), (31) and (32) gives us

$$\mathbb{P}_{\varepsilon} \left( \sup_{t \in T} \left\{ Z_t - Z_{\pi(t)} \right\} \geq 4\alpha + \frac{10}{\sqrt{n}} \int_{\alpha}^{\gamma} \sqrt{2H_2(s)} ds + \gamma \sqrt{\frac{8\pi}{n}} + x \right) \leq 2e^{-nx^2/(8\gamma^2)}.$$

Since this conditional bound holds almost surely with respect to the data, we immediately deduce (28).  $\square$

*Proof of Lemma E3.* Working conditionally upon the data, we can compute by applying Markov's inequality that

$$\begin{aligned} \mathbb{P}_\varepsilon \left( \sup_{v \in V} \left\{ Z_v - (c/4)Z_v^2 \right\} > t \right) &= \mathbb{P}_\varepsilon \left( \exp \left( rn \sup_{v \in V} \left\{ Z_v - (c/4)Z_v^2 \right\} \right) > e^{rnt} \right) \\ &\leq \mathbb{E}_\varepsilon \exp \left( rn \sup_{v \in V} \left\{ Z_v - (c/4)Z_v^2 \right\} \right) e^{-rnt}. \end{aligned}$$

We can further compute that

$$\begin{aligned} \mathbb{E}_\varepsilon \exp \left( rn \sup_{v \in V} \left\{ Z_v - (c/4)Z_v^2 \right\} \right) &= \mathbb{E}_\varepsilon \sup_{v \in V} \exp \left( \sum_{i=1}^n r \varepsilon'_i v_i - (c/4) r v_i^2 \right) \\ &\leq \sum_{v \in V} \mathbb{E}_\varepsilon \exp \left( \sum_{i=1}^n \frac{r^2 v_i^2}{2} - \frac{c r v_i^2}{4} \right), \end{aligned}$$

by applying Hoeffding's lemma to each expectation with respect to the variables  $\varepsilon_i$ . Taking  $r = c/2$ , this is precisely  $\#V$ . Thus, we have that

$$\mathbb{P}_\varepsilon \left( \sup_{v \in V} \left\{ Z_v - (c/4)Z_v^2 \right\} > t \right) \leq \exp \left( \ln(\#V) - \frac{cnt}{2} \right).$$

Since  $\ln(\#V) \leq 2H_2(\gamma)$  almost surely, we can deduce the unconditional bound

$$\mathbb{P} \left( \sup_{v \in V} \left\{ Z_v - (c/4)Z_v^2 \right\} > t \right) \leq \exp \left( 2H_2(\gamma) - \frac{cnt}{2} \right).$$

Taking  $t = (4H_2(\gamma) + 2x)/cn$  gives (29).  $\square$

## F Proofs of Section 5 Results

### F.1 Proof of Corollary 16

We state Corollary 16.

**Corollary 16** (cf. Mendelson (2002, Theorem 5.1)). *Let  $\psi(f, y) = |f - y|^p$  for  $p > 1$  and let the class  $\mathcal{F}$  and response  $Y$  take values in  $[-B, B]$ . Then there exists a universal  $C(p, B) = O(p2^p B^p)$  such that the star estimator  $\tilde{f}$  has excess  $\psi$ -risk bounded as*

$$\mathbb{P} \left( \mathcal{E}(\tilde{f}, \mathcal{F}) \geq \epsilon + \frac{C(p, B)(H_2(\epsilon/C_{p,B}, \mathcal{F}) + \ln(1/\epsilon) + \ln(1/\rho))}{n} \right) \leq \rho, \quad (20)$$

*Proof.* This follows as a result of the more general bound (19), which says that

$$\mathbb{P} \left( \mathcal{E}(\tilde{f}) \geq \epsilon + \left( 36m \vee \frac{72}{\eta} \right) \left( \frac{H_2(\epsilon, \psi \circ \mathcal{F}') + \ln(1/\rho)}{n} \right) \right) \leq \rho.$$

In order to deduce (20), we need to bound the quantities  $m$ ,  $1/\eta$ , and  $H_2(\psi \circ \mathcal{F}')$ . For  $m$ , since  $|f|, |y| \leq B$ , it must hold that  $|f - y|^p \leq 2^p B^p$ . For  $\eta$ , we can compute that

$$(\psi')^2 / \psi'' = \frac{p^2 z^{2p-2}}{p(p-1)z^{p-2}} \leq \frac{pz^p}{p-1} \leq \frac{p2^p B^p}{p-1}$$

for  $z = |f - y| \leq 2B$ . Finally, we have  $\|\psi\|_{\text{lip}} \leq p2^p B^{p-1}$  by bounding the first derivative, so that we have the entropy estimates

$$H_2(\epsilon, \psi \circ \mathcal{F}') \leq H_2 \left( \frac{\epsilon}{p2^p B^{p-1}}, \mathcal{F}' \right) \leq 2H_2 \left( \frac{\epsilon}{p2^{p+1} B^{p-1}}, \mathcal{F} \right) + \ln \left( \frac{4B}{\epsilon} \right),$$

where the last step follows by applying Lemma G4 with  $R \leq \sup_{f,y} |f - y| \leq 2B$ .  $\square$

## E.2 Proof of Lemma 17

We recall Lemma 17.

**Lemma 17** (Foster et al. (2018)). *For all  $f$  and  $\delta \in (0, 1/2]$ , the excess risk relative to  $\mathcal{L}_\delta$  satisfies*

$$\mathcal{E}(f; \mathcal{L}_\delta) \leq \mathcal{E}(f; \mathcal{L}) + 2\delta$$

*Proof.* We can compute that

$$\ln(f) - \ln((1 - \delta)f + \delta) = \ln\left(\frac{f}{(1 - \delta)f + \delta}\right) \leq \ln\left(\frac{1}{1 - \delta}\right) \leq 2\delta, \quad (33)$$

since  $0 \leq -\ln(1 - \delta) \leq 2\delta$  for  $0 \leq \delta \leq 1/2$ . Consequently, for any  $g$ ,

$$\begin{aligned} \mathcal{E}(g; \mathcal{L}_\delta) &= \mathbb{E}[-\ln g] - \inf_{f \in \mathcal{L}_\delta} \mathbb{E}[-\ln f] \\ &= \mathbb{E}[-\ln g] - \inf_{f \in \mathcal{L}} \mathbb{E}[-\ln f] + \inf_{f \in \mathcal{L}} \mathbb{E}[-\ln f] - \inf_{f \in \mathcal{L}_\delta} \mathbb{E}[-\ln f] \\ &= \mathcal{E}(g; \mathcal{L}) + \left( \inf_{f \in \mathcal{L}} \mathbb{E}[-\ln f] - \inf_{f \in \mathcal{L}_\delta} \mathbb{E}[-\ln f] \right) \end{aligned}$$

By separability of the two infima, this is the same as

$$= \mathcal{E}(g; \mathcal{L}) + \sup_{h \in \mathcal{L}_\delta} \inf_{f \in \mathcal{L}} \mathbb{E}[\ln h - \ln f].$$

By choosing  $h = (1 - \delta)f + \delta$ , the outer supremum may be bounded as

$$\begin{aligned} &\geq \mathcal{E}(g; \mathcal{L}) + \inf_{f \in \mathcal{L}} \mathbb{E}[\ln((1 - \delta)f + \delta) - \ln f] \\ &\geq \mathcal{E}(g; \mathcal{L}) - 2\delta, \end{aligned}$$

where the final step follows from negating (33).  $\square$

## E.3 Proof of Corollary 18

We recall Corollary 18.

**Corollary 18.** *With probability at least  $1 - \rho$ , the star estimator  $\tilde{f}_\delta$  in  $\mathcal{L}_\delta$  satisfies*

$$\mathcal{E}(\tilde{f}_\delta; \mathcal{L}) \leq \epsilon + 2\delta + C \ln(1/\delta) \left( \frac{H_2(\delta\epsilon, \mathcal{L}) + \ln(1/\epsilon\delta) + \ln(1/\rho)}{n} \right) \quad (21)$$

*Let  $\mathcal{L}$  be the generalized linear model corresponding to*

$$\mathcal{F}_B = \{x \mapsto Wx \mid W \in \mathbb{R}^{k \times q}, \|W\|_{2 \rightarrow \infty} \leq B\}$$

*with  $A$ -Lipschitz, surjective link  $\varphi$  and features  $X \in \mathbb{R}^q$  that satisfy  $\|X\|_2 \leq R\sqrt{q}$ . Then with probability at least  $1 - \rho$*

$$\mathcal{E}(\varphi^\dagger \circ \tilde{f}_\delta; \mathcal{F}_B) \leq \frac{\ln(n)}{n} \left\{ Ckq \ln(ABRn\sqrt{k}) + \ln(1/\rho) \right\}. \quad (22)$$

*Proof.* By Lemma 17, it suffices for (21) to show instead that

$$\mathbb{P} \left( \mathcal{E}(\tilde{f}_\delta; \mathcal{L}_\delta) > \epsilon + C \ln(1/\delta) \left( \frac{H_2(\delta\epsilon, \mathcal{L}) + \ln(1/\epsilon\delta) + \ln(1/\rho)}{n} \right) \right) \leq \rho.$$

This in turn follows from the general inequality (19), which says in this context that

$$\mathbb{P} \left( \mathcal{E}(\tilde{f}_\delta; \mathcal{L}_\delta) \geq \epsilon + \left( 36m \vee \frac{72}{\eta} \right) \left( \frac{H_2(\epsilon, -\ln \circ \mathcal{L}'_\delta) + \ln(1/\rho)}{n} \right) \right) \leq \rho.$$

Since  $\mathcal{L}'_\delta$  takes values in  $[\delta, 1]$ , the log loss takes values in  $[0, \ln(1/\delta)]$ , so we choose  $m = \ln(1/\delta)$ . Since the log loss is 1-exp-concave, we choose  $\eta = 1$ . Finally, the log loss in this domain is  $(1/\delta)$ -Lipschitz, so we have the estimates

$$H_2(\epsilon, -\ln \circ \mathcal{L}'_\delta) \leq H_2(\delta\epsilon, \mathcal{L}'_\delta) \leq 2H_2(\delta\epsilon/2, \mathcal{L}_\delta) + \ln(2 \ln(1/\delta)/\delta\epsilon),$$



where the last step follows from Lemma G4 with  $R = \ln(1/\delta)$ . Finally, use that  $H_2(-, \mathcal{L}_\delta) \leq H_2(-, \mathcal{L})$  since  $\mathcal{L}_\delta$  is the image of  $\mathcal{L}$  under a pointwise contraction, and simplify (for example absorbing  $\ln \ln(1/\delta) \leq \ln(1/\delta)$ ) into the constant  $C$ ). For (18), we plug in the covering estimates

$$H_2(\delta\epsilon, \mathcal{L}) \leq H_2\left(\frac{\delta\epsilon}{A}, \mathcal{F}_B\right) \leq \ln\left(\frac{ABR\sqrt{k}}{\epsilon\delta}\right)^{kd} = kd \ln\left(\frac{ABR\sqrt{k}}{\delta\epsilon}\right)$$

for  $\mathcal{F}_B$ , which are standard. Finally, we take  $\epsilon = \delta = 1/n$  and simplify.  $\square$

#### F.4 Proof of Corollary 20

We recall Corollary 20.

**Corollary 20.** *Consider a generalized linear model with  $A$ -Lipschitz loss  $f \mapsto -\ln \langle \varphi(f), y \rangle$ . Suppose the entropy numbers  $H_2(\epsilon; \mathcal{F})$  are of order  $\epsilon^{-q}$ . Then, the regularized star estimator  $\varphi^\dagger \circ \tilde{f}_\delta$  with  $\delta = 1/n$  satisfies the rates appearing on the left.*

*On the other hand, for an arbitrary class  $\mathcal{L}$  taking values in  $[0, 1]$  subject to the log loss, the regularized star estimator  $\tilde{f}_\delta$ —for appropriately chosen  $\delta'$ —attains the rates appearing on the right.*

*Here, the symbol  $\lesssim_\rho$  denotes an upper bound that holds with probability  $1 - \rho$ , hiding universal constants and a multiplicative factor  $\ln(1/\rho)$ .*

$$\mathcal{E}(\varphi^\dagger \circ \tilde{f}_\delta) \lesssim_\rho \begin{cases} A^q n^{-2/(2+q)} \ln(n) & q < 2 \\ A^q n^{-1/2} \ln(n) & q = 2 \\ A^q n^{-1/q} & q > 2 \end{cases} \quad \mathcal{E}(\tilde{f}_{\delta'}) \lesssim_\rho \begin{cases} n^{-1/(1+3q/2)} & q < 2 \\ n^{-1/4} \ln(n) & q = 2 \\ n^{-1/(2q)} & q > 2 \end{cases} \quad (24)$$

*Proof.* These bounds are all derived by applying Theorem 19 under different assumptions on the entropy function. In particular combining (23) with Lemma 17—using the fact that the log loss over  $\mathcal{L}_\delta$  takes values in  $[0, \ln(1/\delta)]$  and is 1-exp-concave—gives us that with probability  $1 - \rho$ ,

$$\mathcal{E}(\tilde{f}) \lesssim_\rho 2\delta + \inf_{0 \leq \alpha \leq \gamma} \left\{ 4\alpha + \frac{10}{\sqrt{n}} \int_\alpha^\gamma \sqrt{H_2(s)} ds + \frac{H_2(\gamma) \ln(1/\delta)}{n} + \frac{\gamma}{\sqrt{n}} \right\},$$

where the symbol  $\lesssim_\rho$  hides universal constants and a multiplicative factor  $\ln(1/\rho)$ .

For the left-hand side results, the entropy numbers scale as  $(A/\epsilon)^q$ ; choosing  $\delta = \frac{1}{n}$ , we get

$$\frac{2}{n} + 4\alpha + \frac{10A^{q/2}}{\sqrt{n}} \int_\alpha^\gamma s^{-q/2} ds + \frac{\gamma^{-q} A^q \ln n}{n} + \frac{\gamma}{\sqrt{n}}.$$

For the  $q < 2$  case we take  $\alpha = 0$  and  $\gamma = n^{-1/(2+q)}$ . For the case  $q = 2$  we take  $\alpha = 1/n$  and  $\gamma = 1$ . For the case  $q > 2$  we take  $\alpha = n^{-1/q}$  and  $\gamma = 1$ . For the right-hand side results, the entropy numbers scale as  $(1/\delta\epsilon)^q$ , giving us the bound

$$2\delta + 4\alpha + \frac{12\delta^{-q/2}}{\sqrt{n}} \int_\alpha^\gamma s^{-q/2} ds + \frac{\gamma^{-q} \delta^{-q}}{n} + \frac{\gamma}{\sqrt{n}}.$$

For  $q < 2$ , we take  $\alpha = 0$ ,  $\delta = n^{-1/(1+3q/2)}$ , and  $\gamma = n^{-1/(2+3q)}$ . For  $q = 2$  we take  $\delta = n^{-1/4}$ ,  $\alpha = 1/n$ , and  $\gamma = 1$ . For  $q > 2$  we take  $\delta = \alpha = n^{-1/2q}$  and  $\gamma = 1$ .  $\square$

## G Technical Lemmas

**Lemma G1** (Offset symmetrization). *For every increasing and convex function  $\Psi$ ,*

$$\mathbb{E}\Psi\left(\sup_{t \in T} \left\{ \frac{1}{n} \sum_{i=1}^n (1 - \mathbb{E})A_i(t) - (1 + \mathbb{E})B_i(t) \right\}\right) \leq \mathbb{E}\Psi\left(2 \sup_{t \in T} \left\{ \frac{1}{n} \sum_{i=1}^n \varepsilon'_i A_i(t) - B_i(t) \right\}\right).$$

*Proof.* Noting that  $\mathbb{E}A_i(t) = \mathbb{E}A'_i(t)$  and  $\mathbb{E}B_i(t) = \mathbb{E}B'_i(t)$ , where  $A'_i$  (respectively,  $B'_i$ ) is an independent copy of  $A_i$  (resp.  $B_i$ ), and finally moving the expectations outside by applying Jensen's inequality to the convex function  $\Psi(\sup_{t \in T}(-))$ , we have

$$\begin{aligned} & \mathbb{E}\Psi \left( \sup_{t \in T} \left\{ \frac{1}{n} \sum_{i=1}^n (1 - \mathbb{E})A_i(t) - (1 + \mathbb{E})B_i(t) \right\} \right) \\ & \leq \mathbb{E}\Psi \left( \sup_{t \in T} \left\{ \frac{1}{n} \sum_{i=1}^n A_i(t) - A'_i(t) - B_i(t) - B'_i(t) \right\} \right). \end{aligned}$$

Since  $A_i - A'_i$  is symmetric, it is equal in distribution to  $\varepsilon'_i(A_i - A'_i)$ , where  $\varepsilon'_i$  is a symmetric Rademacher r.v. independent of  $(A, A', B, B')$ , hence we can write

$$\begin{aligned} & = \mathbb{E}\Psi \left( \sup_{t \in T} \left\{ \frac{1}{n} \sum_{i=1}^n \varepsilon'_i(A_i(t) - A'_i(t)) - B_i(t) - B'_i(t) \right\} \right) \\ & = \mathbb{E}\Psi \left( \sup_{t \in T} \left\{ \frac{1}{n} \sum_{i=1}^n \varepsilon'_i A_i(t) - B_i(t) + \frac{1}{n} \sum_{i=1}^n (-\varepsilon'_i)A'_i(t) - B'_i(t) \right\} \right). \\ & = \mathbb{E}\Psi \left( \sup_{t \in T} \left\{ 2\mathbb{E}_\sigma \left[ \frac{\sigma}{n} \sum_{i=1}^n \varepsilon'_i A_i(t) - B_i(t) + \frac{1-\sigma}{n} \sum_{i=1}^n (-\varepsilon'_i)A'_i(t) - B'_i(t) \right] \right\} \right), \end{aligned}$$

where  $\sigma$  is an independent symmetric Bernoulli r.v. By a final application of Jensen's inequality and equality of the distributions of  $(\sigma\varepsilon'_i)_{i=1}^n$  and  $((1-\sigma)(-\varepsilon'_i))_{i=1}^n$ , this is

$$\begin{aligned} & \leq \mathbb{E}\Psi \left( 2 \sup_{t \in T} \left\{ \frac{\sigma}{n} \sum_{i=1}^n \varepsilon'_i A_i(t) - B_i(t) + \frac{1-\sigma}{n} \sum_{i=1}^n (-\varepsilon'_i)A'_i(t) - B'_i(t) \right\} \right), \\ & = \mathbb{E}\Psi \left( 2 \sup_{t \in T} \left\{ \frac{1}{n} \sum_{i=1}^n \varepsilon'_i A_i(t) - B_i(t) \right\} \right), \end{aligned} \tag{34}$$

which is what we aimed to show.  $\square$

**Lemma G2** (Offset contraction). *Suppose that  $|A_i(s) - A_i(t)| \leq |C_i(s) - C_i(t)|$  for all  $s, t \in T$ . Then, for all increasing and convex  $\Psi$ , we have*

$$\mathbb{E}\Psi \left( 2 \sup_{t \in T} \left\{ \frac{1}{n} \sum_{i=1}^n \varepsilon'_i A_i(t) - B_i(t) \right\} \right) \leq \mathbb{E}\Psi \left( 2 \sup_{t \in T} \left\{ \frac{1}{n} \sum_{i=1}^n \varepsilon'_i C_i(t) - B_i(t) \right\} \right), \tag{35}$$

whenever the  $\varepsilon'_i$  are symmetric Rademacher variables that are independent of  $A, B$  and  $C$ .

*Proof.* To simplify notation, put

$$S_m(t) = \sum_{i=1}^m \varepsilon'_i A_i(t) - B_i(t).$$

Writing out the expectation with respect to  $\varepsilon'_n$  gives

$$\begin{aligned} & \mathbb{E}\Psi \left( 2 \sup_{t \in T} \left\{ \frac{1}{n} \sum_{i=1}^n \varepsilon'_i A_i(t) - B_i(t) \right\} \right) \\ & = \mathbb{E}\Psi \left( \frac{1}{n} \sum_{j=1}^2 \sup_{t \in T} \left\{ (-1)^j A_n(t) + S_{n-1}(t) - B_n(t) \right\} \right) \\ & = \mathbb{E}\Psi \left( \frac{1}{n} \sup_{s, t \in T} \left\{ A_n(s) - A_n(t) + (S_{n-1}(s) - B_n(s)) - (S_{n-1}(t) - B_n(t)) \right\} \right). \end{aligned}$$

Applying our assumption that  $|A_i(s) - A_i(t)| \leq |C_i(s) - C_i(t)|$ , this is

$$\leq \mathbb{E}\Psi \left( \frac{1}{n} \sup_{s, t \in T} \left\{ |C_n(s) - C_n(t)| + (S_{n-1}(s) - B_n(s)) - (S_{n-1}(t) - B_n(t)) \right\} \right).$$

Since the argument of the supremum is symmetric in  $(s, t)$ , we can remove the absolute value, yielding

$$\leq \mathbb{E}\Psi \left( \frac{1}{n} \sup_{s, t \in T} \left\{ C_n(s) - C_n(t) + (S_{n-1}(s) - B_n(s)) + (S_{n-1}(t) - B_n(t)) \right\} \right).$$

Since the supremum is now separable in  $(s, t)$ , we further have

$$\begin{aligned} &= \mathbb{E}\Psi \left( \frac{1}{n} \sum_{j=1}^2 \sup_{t \in T} \left\{ (-1)^j C_n(t) - B_n(t) + S_{n-1}(t) \right\} \right) \\ &= \mathbb{E}\Psi \left( \frac{2}{n} \sup_{t \in T} \left\{ \varepsilon_n C_n(t) - B_n(t) + S_{n-1}(t) \right\} \right). \end{aligned}$$

Applying these manipulations to each summand  $r$  from  $n-1$  down to 1 gives us

$$\begin{aligned} &\leq \mathbb{E}\Psi \left( \sup_{t \in T} \left\{ \frac{2}{n} \sum_{i=r}^n \varepsilon_i C_i(t) - B_i(t) + S_{r-1}(t) \right\} \right) \\ &\leq \mathbb{E}\Psi \left( 2 \sup_{t \in T} \left\{ \frac{1}{n} \sum_{i=1}^n \varepsilon_i C_i(t) - B_i(t) \right\} \right), \end{aligned}$$

which is what we aimed to show.  $\square$

**Lemma G3** (Log margin computation). *For  $|z| \leq c$ ,*

$$e^{-z} + z - 1 \geq \frac{z^2}{2c \vee 4}.$$

*Proof.* Note that  $z - 1 \geq z/2 \geq z^2/(2c)$  for  $z \geq 2$ . So it suffices to check the inequality for  $z < 2$ . On the other hand, one can check by minimizing the left-hand side that

$$\frac{e^{-z} + z - 1}{z^2} \geq \frac{1}{4}$$

for  $0 < z < 2$  (the derivative of the left-hand side is negative, and the inequality holds at  $z = 2$ ). Finally, the inequality for  $z \leq 0$  follows by noting that

$$e^{-z} - 1 + z = \frac{z^2}{2} + \sum_{k=3}^{\infty} \frac{(-z)^k}{k!},$$

by the series expansion for  $e^{-z}$  and the remainder term must be non-negative for  $z \leq 0$ .  $\square$

**Lemma G4** (cf. Mendelson (2002, Lemma 4.5)). *Put  $\mathcal{F}' = \cup_{\lambda \in [0,1]} \lambda \mathcal{F} + (1-\lambda)\mathcal{F}$  and  $R_\mu = \sup_{f \in \mathcal{F}} \|f\|_{L^2(\mu)}$ . Let  $N_2(\epsilon, S, \mu)$  denote the  $\epsilon$ -covering number of the set  $S$  in  $L^2(\mu)$ . Then*

$$N_2(\epsilon, \mathcal{F}', \mu) \leq \left( \frac{2R_\mu}{\epsilon} \right) N_2(\epsilon/2, \mathcal{F}, \mu)^2. \quad (36)$$

*Consequently, if  $R = \sup_\mu R_\mu$  where the supremum is over probability measures,*

$$H_2(\epsilon, \mathcal{F}') \leq 2H_2(\epsilon/2, \mathcal{F}) + \ln \left( \frac{2R}{\epsilon} \right). \quad (37)$$

*Proof.* Let  $S$  denote a minimal covering of  $\mathcal{F}$  in  $L^2(\mu)$  at resolution  $\epsilon/2$ . Given some  $(s, t) \in S^2$ , let  $T(s, t)$  denote an  $\epsilon/2$  covering of the line segment interpolating  $s$  and  $t$ . This line segment has length at most  $2R_\mu$  in  $L^2(\mu)$ , hence  $\#T(s, t) \leq \frac{2R_\mu}{\epsilon}$ . We are therefore done if we can show that

$$\bigcup_{(s,t) \in S^2} T(s, t)$$

is an  $\epsilon$  covering of  $\mathcal{F}'$ .

To this end, let  $f \in \mathcal{F}'$  be given. By definition, we may write  $f = \lambda f_1 + (1 - \lambda)f_2$  for  $f_1, f_2 \in \mathcal{F}$ , and we can choose  $s_1, s_2 \in S$  such that

$$\|s_1 - f_1\|_{L^2(\mu)}, \|s_2 - f_2\|_{L^2(\mu)} \leq \epsilon/2.$$

Due to convexity of the norm, we must have that

$$\|(\lambda s_1 + (1 - \lambda)s_2) - f\|_{L^2(\mu)} \leq \epsilon/2.$$

By construction, there exists some  $h \in T(s_1, s_2)$  such that

$$\|(\lambda s_1 + (1 - \lambda)s_2) - h\|_{L^2(\mu)} \leq \epsilon/2.$$

Using the triangle inequality, we deduce  $\|f - h\|_{L^2(\mu)} \leq \epsilon$  and the proof of (36) is complete; (37) then follows by first taking logarithms, then taking the supremum over probability measures  $\mu$ .  $\square$

## References

- Jean-yves Audibert. Progressive mixture rules are deviation suboptimal. In J. C. Platt, D. Koller, Y. Singer, and S. T. Roweis, editors, *Advances in Neural Information Processing Systems 20*, pages 41–48. Curran Associates, Inc., 2008.
- Jean-Yves Audibert. Fast learning rates in statistical inference through aggregation. *The Annals of Statistics*, 37(4):1591–1646, 2009. doi: 10.1214/08-AOS623. URL <https://doi.org/10.1214/08-AOS623>.
- Peter L. Bartlett, Olivier Bousquet, and Shahar Mendelson. Local Rademacher complexities. *Annals of Statistics*, 33(4):1497–1537, August 2005. ISSN 0090-5364, 2168-8966. doi: 10.1214/009053605000000282.
- Peter L. Bartlett, Michael I. Jordan, and Jon D. McAuliffe. Convexity, Classification, and Risk Bounds. *Journal of the American Statistical Association*, 101(473):138–156, 2006. ISSN 0162-1459.
- Blair Bilodeau, Dylan Foster, and Daniel Roy. Tight Bounds on Minimax Regret under Logarithmic Loss via Self-Concordance. In *International Conference on Machine Learning*, pages 919–929. PMLR, November 2020.
- Bernd Carl, Ioanna Kyrezi, and Alain Pajor. Metric Entropy of Convex Hulls in Banach Spaces. *Journal of the London Mathematical Society*, 60(3):871–896, December 1999. ISSN 0024-6107. doi: 10.1112/S0024610799008005.
- Charles Chidume. Inequalities in Uniformly Convex Spaces. In Charles Chidume, editor, *Geometric Properties of Banach Spaces and Nonlinear Iterations*, Lecture Notes in Mathematics, pages 29–44. Springer, London, 2009. ISBN 978-1-84882-190-3. doi: 10.1007/978-1-84882-190-3\_4.
- Dylan J. Foster, Satyen Kale, Haipeng Luo, Mehryar Mohri, and Karthik Sridharan. Logistic Regression: The Importance of Being Improper. In *Conference On Learning Theory*, pages 167–208. PMLR, July 2018.
- Elad Hazan, Tomer Koren, and Kfir Y. Levy. Logistic regression: Tight bounds for stochastic and online optimization. In Maria Florina Balcan, Vitaly Feldman, and Csaba Szepesvári, editors, *Proceedings of the 27th Conference on Learning Theory*, volume 35 of *Proceedings of Machine Learning Research*, pages 197–209, Barcelona, Spain, June 2014. PMLR.
- Rémi Jézéquel, Pierre Gaillard, and Alessandro Rudi. Efficient improper learning for online logistic regression. In Jacob Abernethy and Shivani Agarwal, editors, *Proceedings of Thirty Third Conference on Learning Theory*, volume 125 of *Proceedings of Machine Learning Research*, pages 2085–2108. PMLR, 09–12 Jul 2020. URL <https://proceedings.mlr.press/v125/jezequel120a.html>.
- A. Juditsky, P. Rigollet, and A. B. Tsybakov. Learning by mirror averaging. *Annals of Statistics*, 36(5): 2183–2206, October 2008. ISSN 0090-5364, 2168-8966. doi: 10.1214/07-AOS546.
- Vladimir Koltchinskii and Dmitriy Panchenko. Rademacher Processes and Bounding the Risk of Function Learning. In Evarist Giné, David M. Mason, and Jon A. Wellner, editors, *High Dimensional Probability II*, Progress in Probability, pages 443–457, Boston, MA, 2000. Birkhäuser. ISBN 978-1-4612-1358-1. doi: 10.1007/978-1-4612-1358-1\_29.
- Michel Ledoux and Michel Talagrand. Rademacher Averages. In Michel Ledoux and Michel Talagrand, editors, *Probability in Banach Spaces: Isoperimetry and Processes*, Ergebnisse Der Mathematik Und Ihrer Grenzgebiete, pages 89–121. Springer, Berlin, Heidelberg, 1991. ISBN 978-3-642-20212-4. doi: 10.1007/978-3-642-20212-4\_6.
- Tengyuan Liang, Alexander Rakhlin, and Karthik Sridharan. Learning with Square Loss: Localization through Offset Rademacher Complexity. In *Conference on Learning Theory*, pages 1260–1285, June 2015.
- Ulysse Marteau-Ferey, Dmitrii Ostrovskii, Francis Bach, and Alessandro Rudi. Beyond Least-Squares: Fast Rates for Regularized Empirical Risk Minimization through Self-Concordance. In *Conference on Learning Theory*, pages 2294–2340. PMLR, June 2019.
- Nishant Mehta. Fast rates with high probability in exp-concave statistical learning. In *Artificial Intelligence and Statistics*, pages 1085–1093. PMLR, April 2017.
- S. Mendelson. Improving the sample complexity using global data. *IEEE Transactions on Information Theory*, 48(7):1977–1991, July 2002. ISSN 0018-9448. doi: 10.1109/TIT.2002.1013137.
- Jaouad Mourtada and Stéphane Gaïffas. An improper estimator with optimal excess risk in misspecified density estimation and logistic regression. *arXiv:1912.10784 [math, stat]*, 2020.
- Yurii Nesterov. *Introductory Lectures on Convex Optimization: A Basic Course*. Springer Publishing Company, Incorporated, first edition, 2014. ISBN 1-4613-4691-6.
- Dmitry Panchenko. Symmetrization approach to concentration inequalities for empirical processes. *Annals of Probability*, 31(4):2068–2081, October 2003. ISSN 0091-1798, 2168-894X. doi: 10.1214/aop/1068646378.
- Alexander Rakhlin and Karthik Sridharan. Online Non-Parametric Regression. In *Conference on Learning Theory*, pages 1232–1264, May 2014.

- Alexander Rakhlin and Karthik Sridharan. Online Nonparametric Regression with General Loss Functions. *arXiv:1501.06598 [cs, math, stat]*, January 2015. Comment: arXiv admin note: substantial text overlap with arXiv:1402.2594.
- Alexander Rakhlin, Karthik Sridharan, and Alexandre B. Tsybakov. Empirical entropy, minimax regret and minimax risk. *Bernoulli*, 23(2):789–824, May 2017. ISSN 1350-7265. doi: 10.3150/14-BEJ679.
- Philippe Rigollet. Kullback–Leibler aggregation and misspecified generalized linear models. *Annals of Statistics*, 40(2):639–665, April 2012. ISSN 0090-5364, 2168-8966. doi: 10.1214/11-AOS961.
- Nathan Srebro, Karthik Sridharan, and Ambuj Tewari. Smoothness, low noise and fast rates. In J. Lafferty, C. Williams, J. Shawe-Taylor, R. Zemel, and A. Culotta, editors, *Advances in Neural Information Processing Systems*, volume 23, pages 2199–2207. Curran Associates, Inc., 2010.
- Alexander B. Tsybakov. Optimal aggregation of classifiers in statistical learning. *Annals of Statistics*, 32(1): 135–166, February 2004. ISSN 0090-5364, 2168-8966. doi: 10.1214/aos/1079120131.
- Alexandre B. Tsybakov. Optimal Rates of Aggregation. In Bernhard Schölkopf and Manfred K. Warmuth, editors, *Learning Theory and Kernel Machines*, Lecture Notes in Computer Science, pages 303–313, Berlin, Heidelberg, 2003. Springer. ISBN 978-3-540-45167-9. doi: 10.1007/978-3-540-45167-9\_23.
- Tim van Erven, Peter D. Grünwald, Nishant A. Mehta, Mark D. Reid, and Robert C. Williamson. Fast Rates in Statistical and Online Learning. *Journal of Machine Learning Research*, 16(54):1793–1861, 2015. ISSN 1533-7928.
